# Supplementary material for: Photodecay of guaiacol is faster in ice, and even more rapid on ice, than in aqueous solution
Source: Royal Society of Chemistry journal article supplement (doi:10.1039/d0em00242a), 2020-01-01
Supplement: d0em00242a3.pdf [file d0em00242a3.pdf]

Note: the current version of Supplemental Movie M1 is located here:

<https://www.dropbox.com/sh/jj67nyrbg8ryjf3/AAAwIChFD2zIKraBuRNigwHca?dl=0>

We were not able to upload this file through the automated system, due to file size limitations in that system. While we would prefer to keep this movie in its original size and format (~200 MB), we will work within the requirements of the journal.
